# Supplementary material for: Multimodal sensory integration in single cerebellar granule cells in vivo
Source: eLife journal article supplement (doi:10.7554/elife.12916), 2015-12-29
Supplement: supp [file elife-12916-supp-v1.zip]

### EPSCs evoked by unimodal sensory stimulation

|                      | Area      | N  | EPSC number   | Latency (ms)   | Average IEI    | Minimum IEI   | Mean amplitude (pA) |
|----------------------|-----------|----|---------------|----------------|----------------|---------------|---------------------|
| <b>Somatosensory</b> | Crus      | 39 | $2.1 \pm 0.2$ | $35.9 \pm 4.6$ | $18.2 \pm 1.9$ | $2.6 \pm 0.3$ | $23.3 \pm 1.8$      |
|                      | Parafloc. | 3  | $2.0 \pm 1.2$ | $168 \pm 18$   | $36.7 \pm 3.3$ | $2.3 \pm 0.5$ | $20.5 \pm 3.9$      |
| <b>Auditory</b>      | Crus      | 32 | $3.4 \pm 1.0$ | $51.0 \pm 6.0$ | $23.3 \pm 2.6$ | $6.7 \pm 2.1$ | $21.5 \pm 1.7$      |
|                      | Parafloc. | 2  | $1.4 \pm 0.1$ | $148 \pm 21$   | $27.9 \pm 7.8$ | $2.8 \pm 0.8$ | $21.4 \pm 0.3$      |
| <b>Visual</b>        | Crus      | 1  | 4.0           | 120.3          | 28.8           | 0.9           | 15.4                |
|                      | Parafloc. | 13 | $2.9 \pm 0.6$ | $91.0 \pm 9.6$ | $26.0 \pm 4.9$ | $2.8 \pm 0.7$ | $25.7 \pm 3.6$      |
