# Supplementary figures and images for: Multimodal sensory integration in single cerebellar granule cells in vivo
Source: eLife journal article supplement (doi:10.7554/elife.12916), 2015-12-29

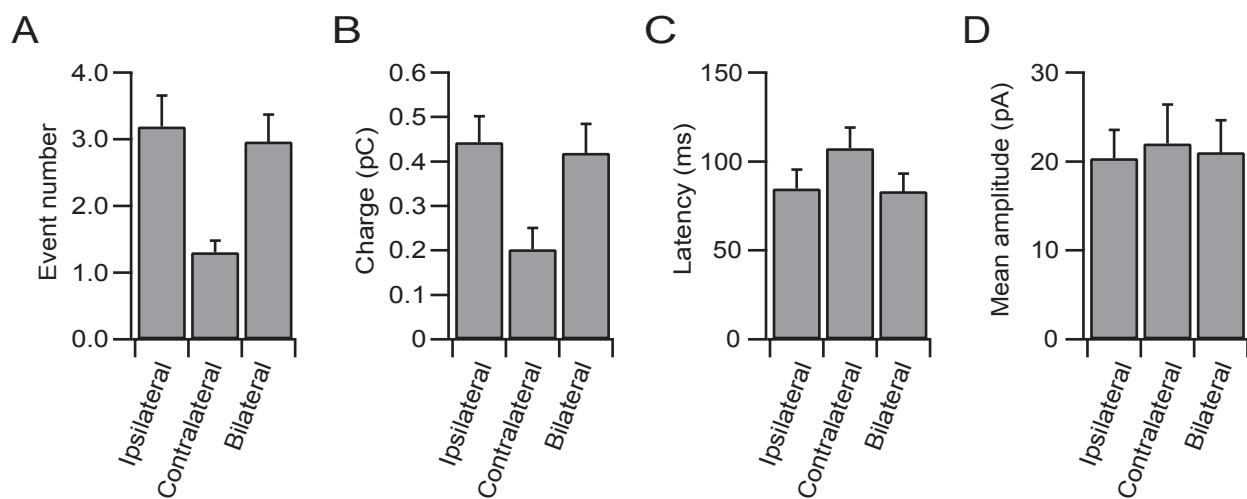

Figure 1 — figure supplement 2

Supplement: supp [file elife-12916-supp-v1.zip]

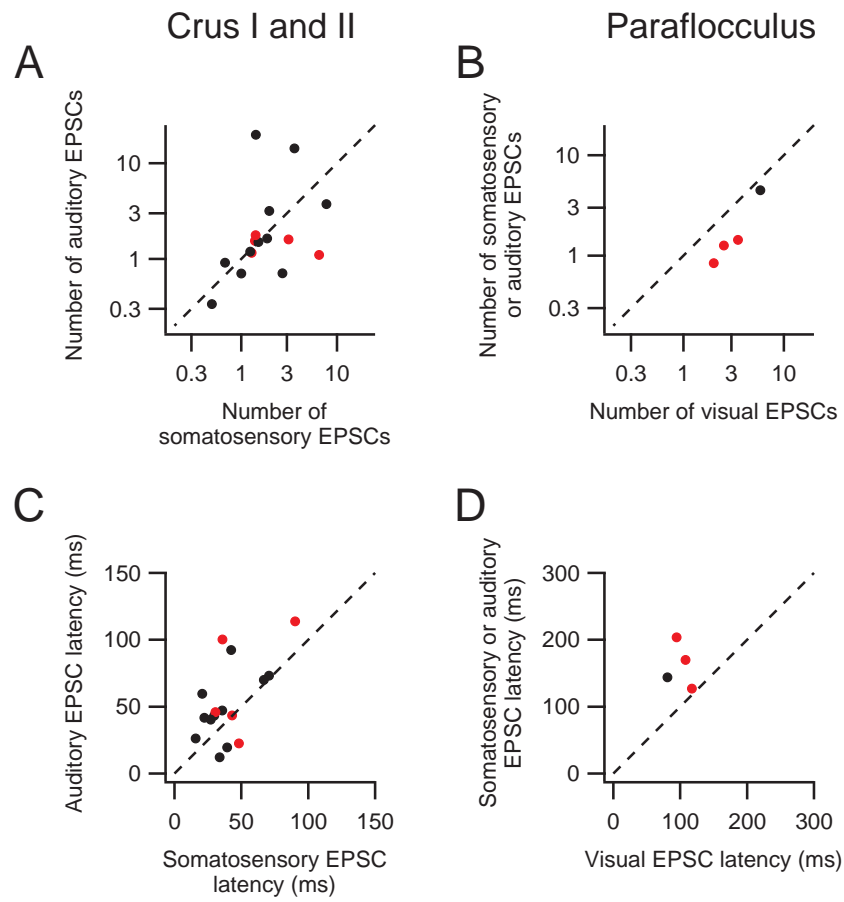

Figure 2 — figure supplement 1

Supplement: supp [file elife-12916-supp-v1.zip]

**A**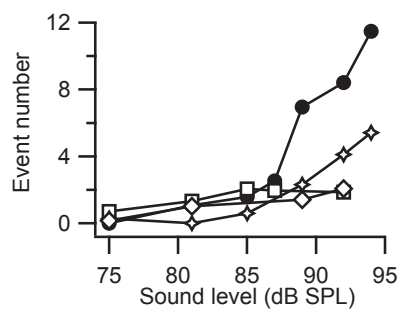**B**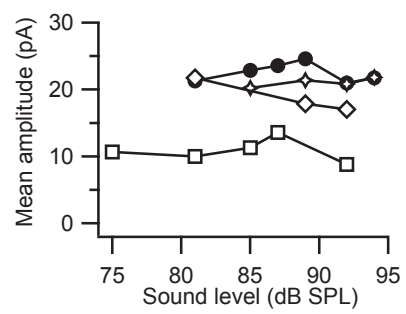

Figure 1 — figure supplement 1

Supplement: supp [file elife-12916-supp-v1.zip]
